# Supplementary material for: Affective mirror and anti-mirror neurons relate to prosocial help in rats
Source: PubMed Central journal article supplement — iScience. 2022 Dec 23;26(1):105865. doi: 10.1016/j.isci.2022.105865 (PMC9826941; doi:10.1016/j.isci.2022.105865), 2022-12-23
Supplement: mmc1.pdf [file mmc1.pdf]

**iScience, Volume 26**

**Supplemental information**

**Affective mirror and anti-mirror  
neurons relate to prosocial help in rats**

**Wen-Yi Wu, Yawei Cheng, Keng-Chen Liang, Ray X. Lee, and Chen-Tung Yen**

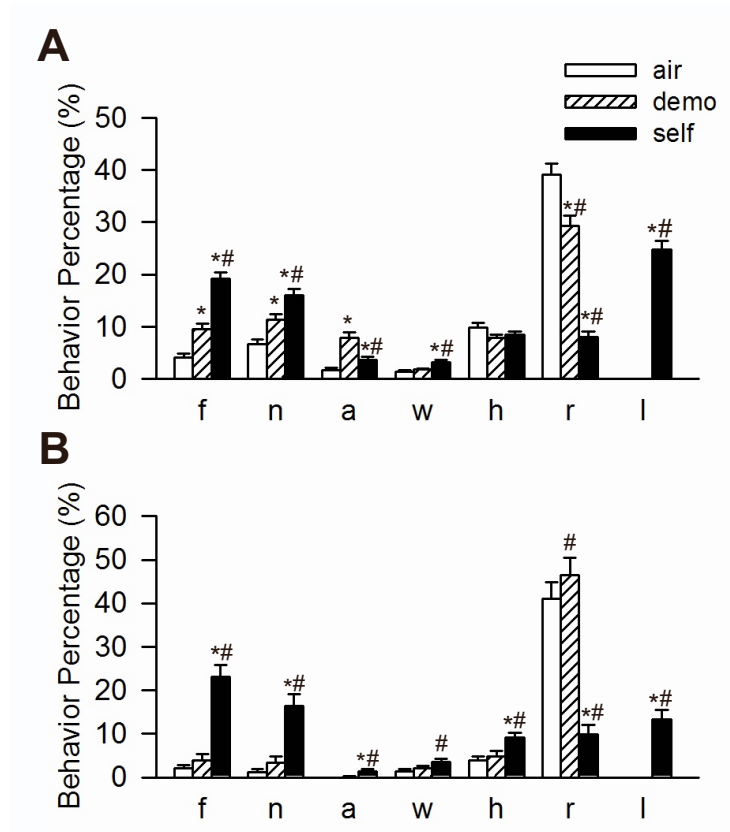

**Figure S1. Seven focal behaviors in transparent (A) and opaque (B) partition experiments.**

Related to Figure 1. Mean percentages of each behavior shown by observer rats in 1-s time bins for the 3 types of blocks. Data are presented as mean  $\pm$  SEM, \* $p < 0.025$  compared to values in the “air” block; # $p < 0.025$ , compared to values in the “demo” block (one sided Mann-Whitney U test at a significance level of  $\alpha = 0.05$ , with Bonferroni correction); Abbreviation: f, freezing; n, sniffing; a, social approach; w, walking; h, heading; r, resting; k, whisking; l, licking.

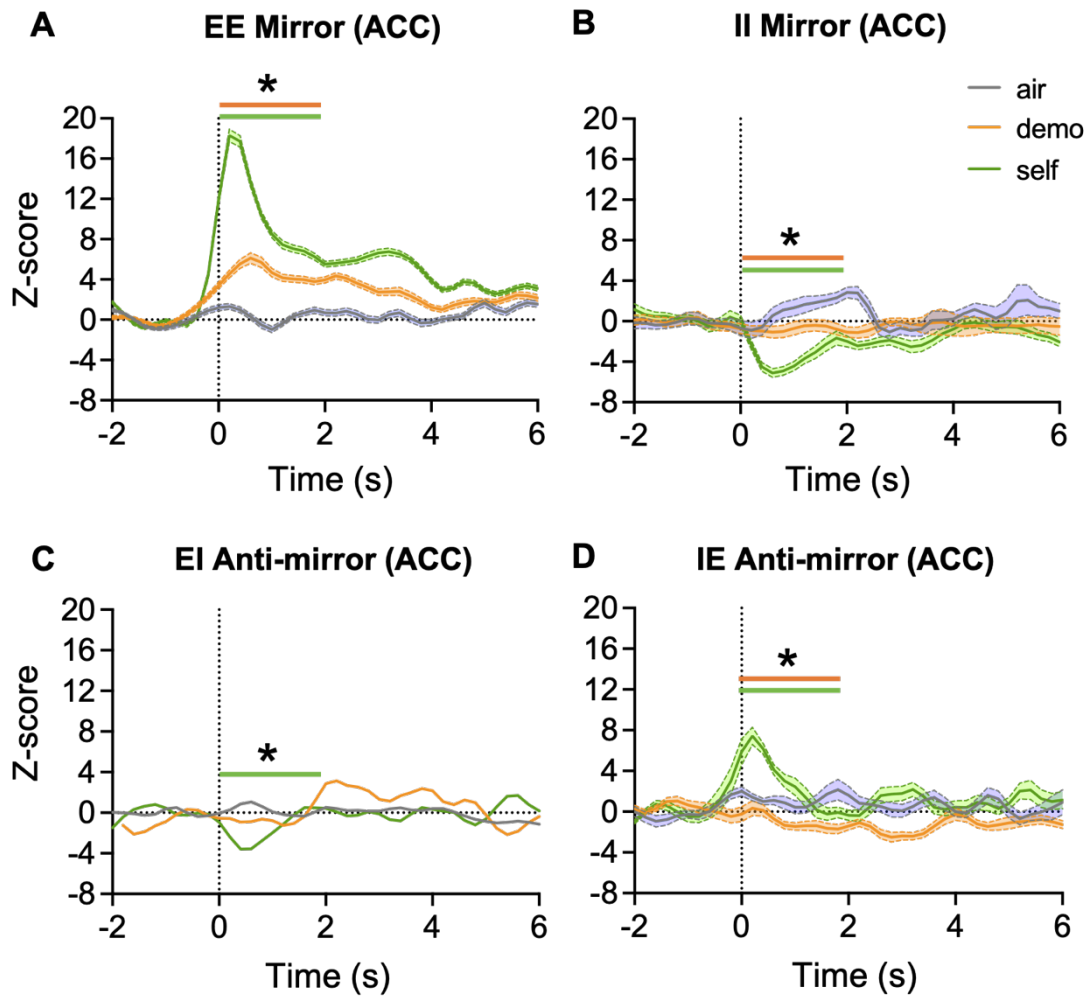

**Figure S2. Activities of ACC EE, ACC II, ACC EI, and ACC IE ensembles around laser pulses in the observational distress test.** Related to Figure 2. Data are presented as mean  $\pm$  SEM.

\*  $p < 0.05$ , Mann-Whitney U-test compared to air.

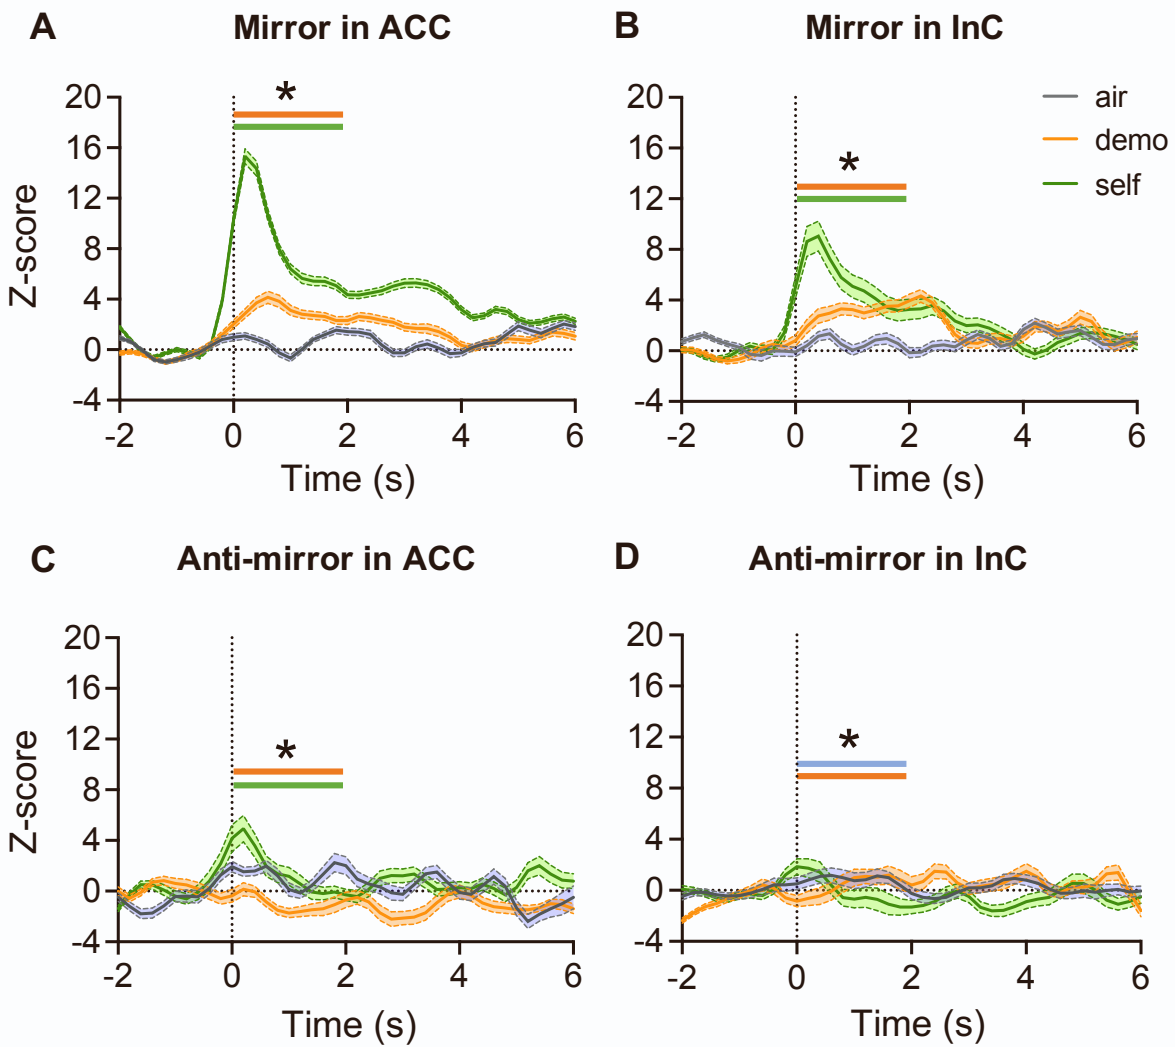

**Figure S3. Activities of mirror and anti-mirror ensembles in the ACC and InC around laser pulses in the observational distress test.** Related to Figure 2. Data are presented as mean  $\pm$  SEM.

\*  $p < 0.05$ , Mann-Whitney U-test compared to air.

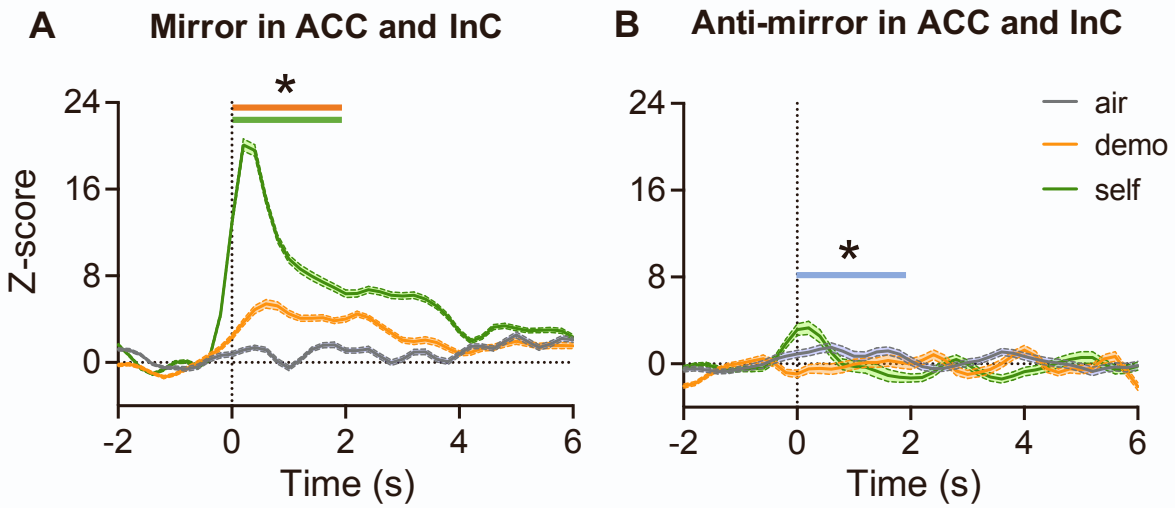

**Figure S4. Activities of the ACC-InC mirror and anti-mirror ensembles around laser pulses in the observational distress test.** Related to Figure 2. Data are presented as mean  $\pm$  SEM. \*  $p < 0.05$ , Mann-Whitney U-test compared to air.

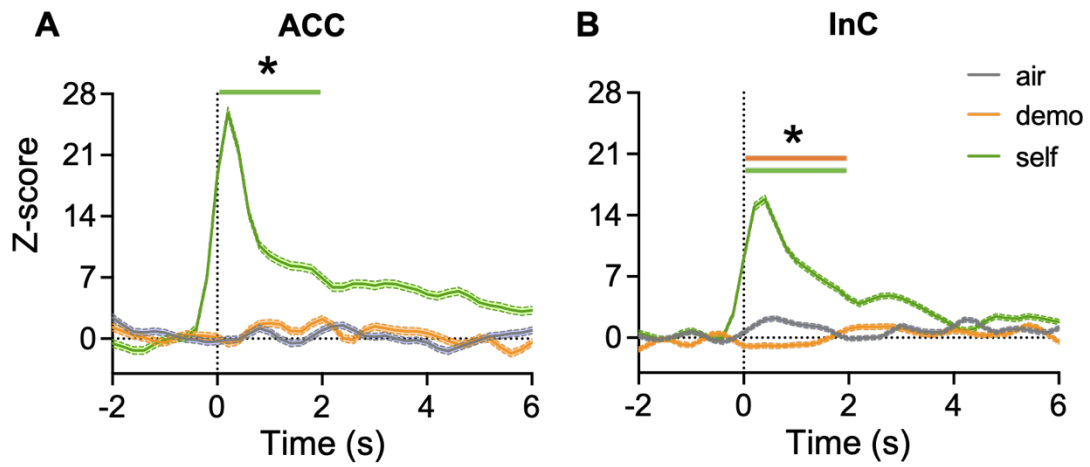

**Figure S5. Activities of the ACC and InC ensembles around laser pulses in the observational distress test.** Related to Figure 2. Data are presented as mean  $\pm$  SEM. \*  $p < 0.05$ , Mann-Whitney U-test compared to air.

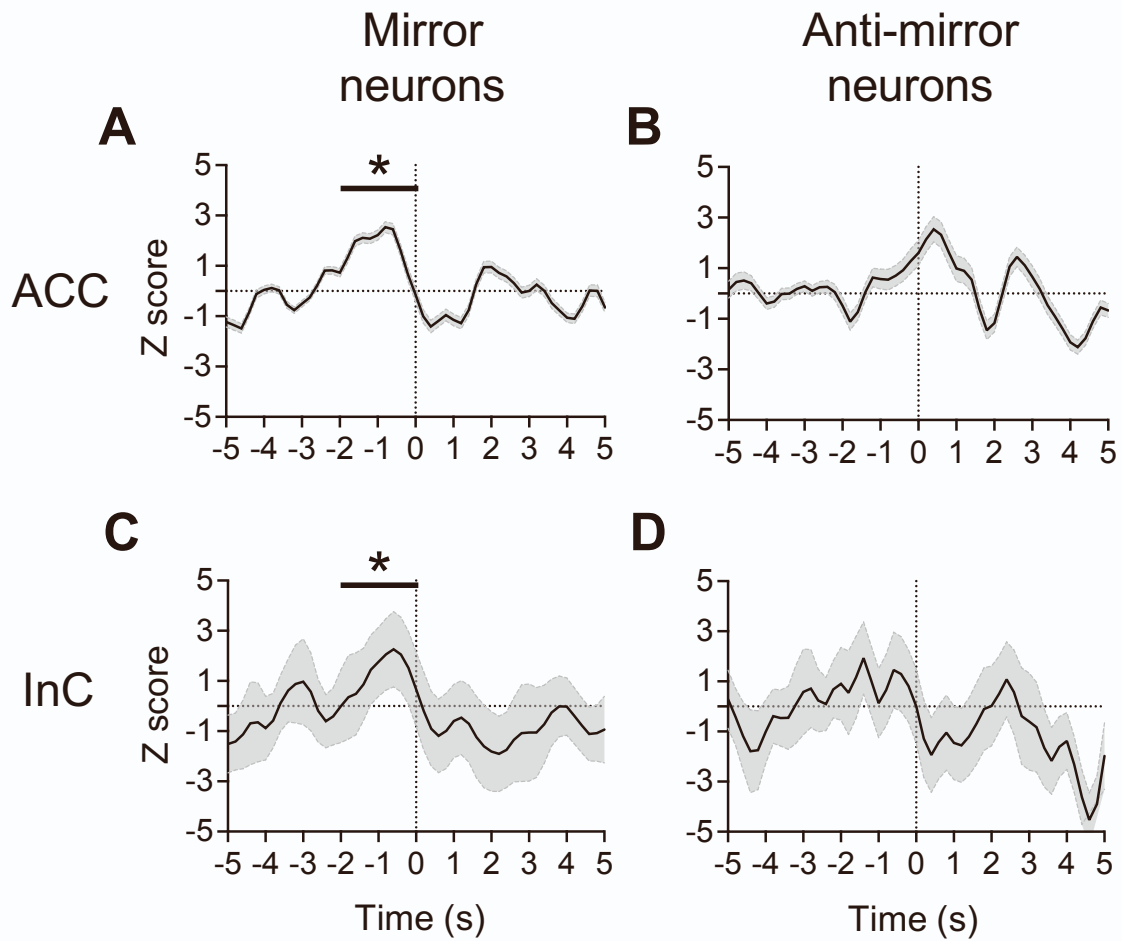

**Figure S6. Activities of neuronal ensembles around social approach behaviors in the observational distress test.** Related to Figure 4 and 5. Data are presented as mean  $\pm$  SEM. \*  $p < 0.05$ , one-sample Wilcoxon signed-rank test.

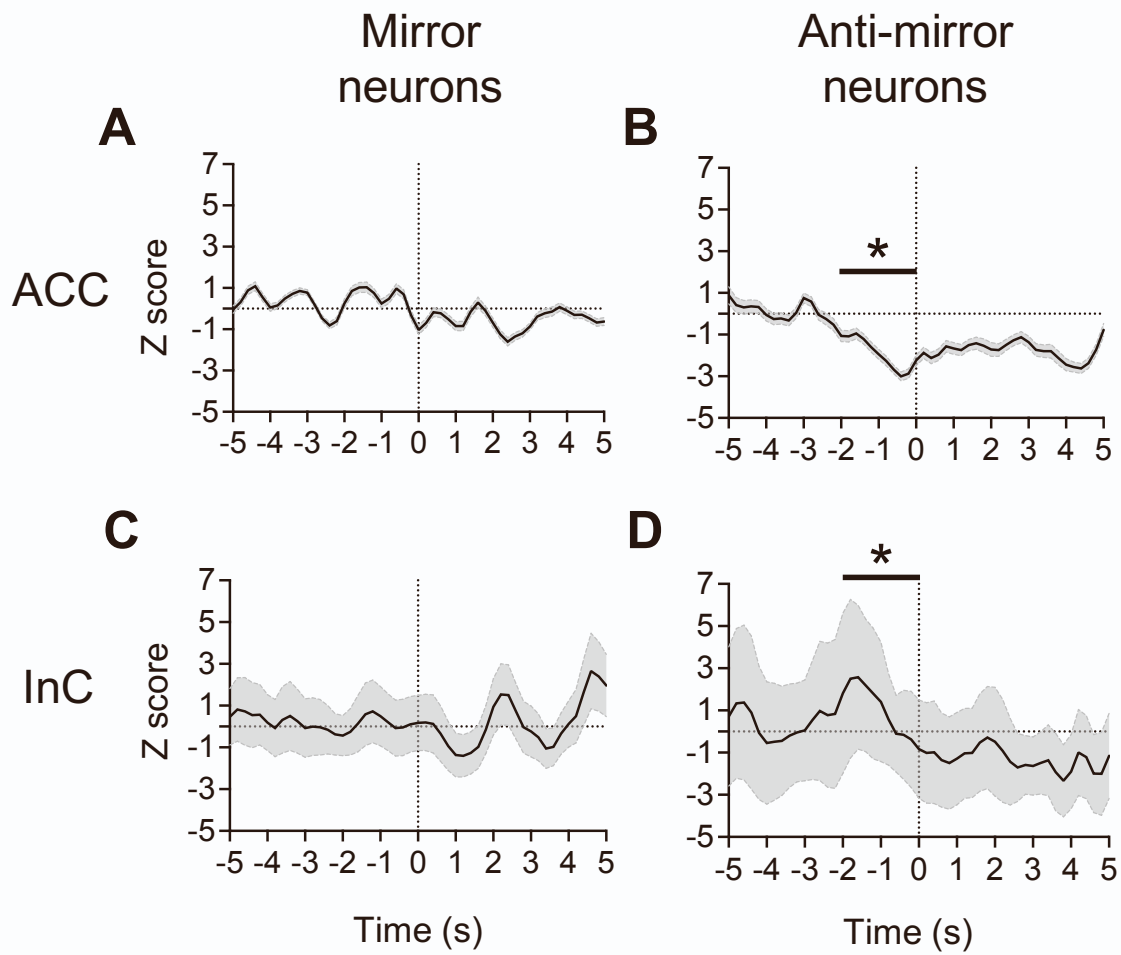

**Figure S7. Activities of neuronal ensembles around freezing behaviors in the observational distress test.** Related to Figure 4 and 5. Data are presented as mean  $\pm$  SEM. \*  $p < 0.05$ , one-sample Wilcoxon signed-rank test.
